# Supplementary material for: Regulation of Ca2+ channels by SNAP-25 via recruitment of syntaxin-1 from plasma membrane clusters
Source: PubMed Central journal article supplement — Mol Biol Cell. 2016 Nov 1;27(21):3329–41. doi: 10.1091/mbc.E16-03-0184 (PMC5170865; doi:10.1091/mbc.e16-03-0184), 2016-11-01
Supplement: supp_E16-03-0184v1_CombinedSupMats.pdf [file supp_E16-03-0184v1_CombinedSupMats.pdf]

# Supplemental Materials

*Molecular Biology of the Cell*

Toft-Bertelsen et al.

## Supplementary figure legends

### **Figure S1 – Overexpression of syntaxin-1A does not increase SNAP-25 immunoavailability.**

A. Confocal mid sections of WT adrenal chromaffin cell, WT cell expressing syntaxin-1A, and WT cell expressing EGFP stained against SNAP-25. Scale bar: 3  $\mu\text{m}$ .

B. Quantification of the SNAP-25 immunolabeling identified no significant increase in SNAP-25 immunofluorescence upon syntaxin-1a overexpression (one-way ANOVA: not significant). N=3, n=29-32.

### **Figure S2 - Overexpression of Doc2B in chromaffin cells causes a marked reduction in calcium influx.**

A. Time course of the intracellular calcium concentration, measured by microfluorimetry in chromaffin cells from Doc2B WT or Doc2B KO mice and Doc2B KO cells overexpressing Doc2b, using a repetitive stimulation protocol consisting of 6 brief (10 ms) and 4 long (100 ms) membrane depolarizations from -70 mV to +20 mV.

B. Steady-state calcium current amplitudes evoked by a brief (10 ms) membrane depolarization in the same experimental groups as in panel A from -70 mV to +20 mV. \*\*\*,  $p < 0.0001$ , (one-way ANOVA with Tukey's post hoc test). Doc2B WT,  $n = 24$ ; Doc2B KO,  $n = 26$ ; Doc2B KO + Doc2B o.e.,  $n = 21$ .

### **Figure S3 - Overexpression of ubMunc13-2 induces a massive increase in catecholamine secretion from chromaffin cells upon intracellular calcium uncaging.**

A. Average ( $\pm$  SEM)  $[\text{Ca}^{2+}]_i$  attained after uncaging, measured by microfluorimetry.

B. The changes in cell membrane capacitance (mean traces for all recorded cells).

C. Amperometric signal (mean traces); left ordinate axis: amperometric current; right ordinate axis: amperometric charge. Dark lilac traces, WT cells ( $n = 12$ ); magenta traces, WT cells overexpressing ubMunc13-2 ( $n = 11$ ).

### **Figure S4 - Recruitment of syntaxin from plasma membrane clusters by SNAP-25 downregulates $\text{Ca}^{2+}$ channels.**

Recruitment of syntaxin-1 from dense clusters by SNAP-25 leads to down regulation of  $\text{Ca}^{2+}$  channels, possibly because the recruited syntaxin-1 becomes available for direct interaction with  $\text{Ca}^{2+}$  channels.

**A**

anti-SNAP-25

SNAP-25 WT

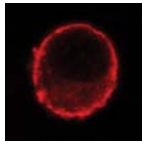SNAP-25 WT  
+ syntaxin-1A o.e.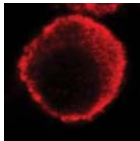SNAP-25 WT  
+ EGFP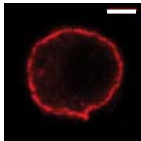**B**

SNAP-25 Fluor. int. (A.U.)

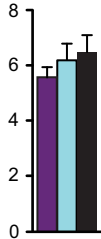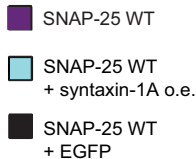

Toft-Bertelsen et al., Figure S1

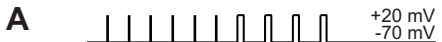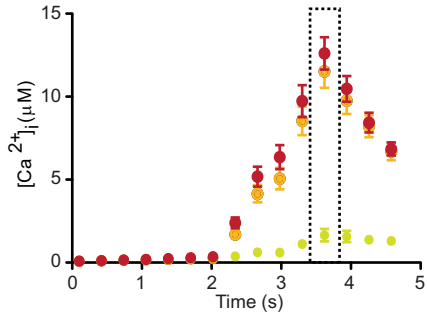

■ Doc2B WT    ■ Doc2B KO    ■ Doc2B KO + Doc2B o.e.

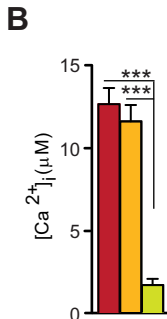

Toft-Bertelsen et al., Figure S2

**A**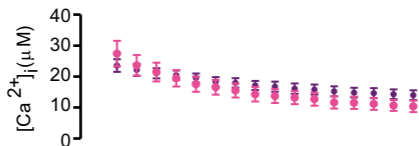**B**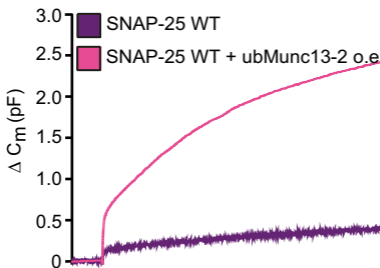**C**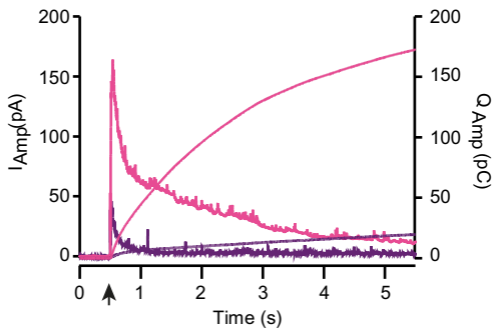

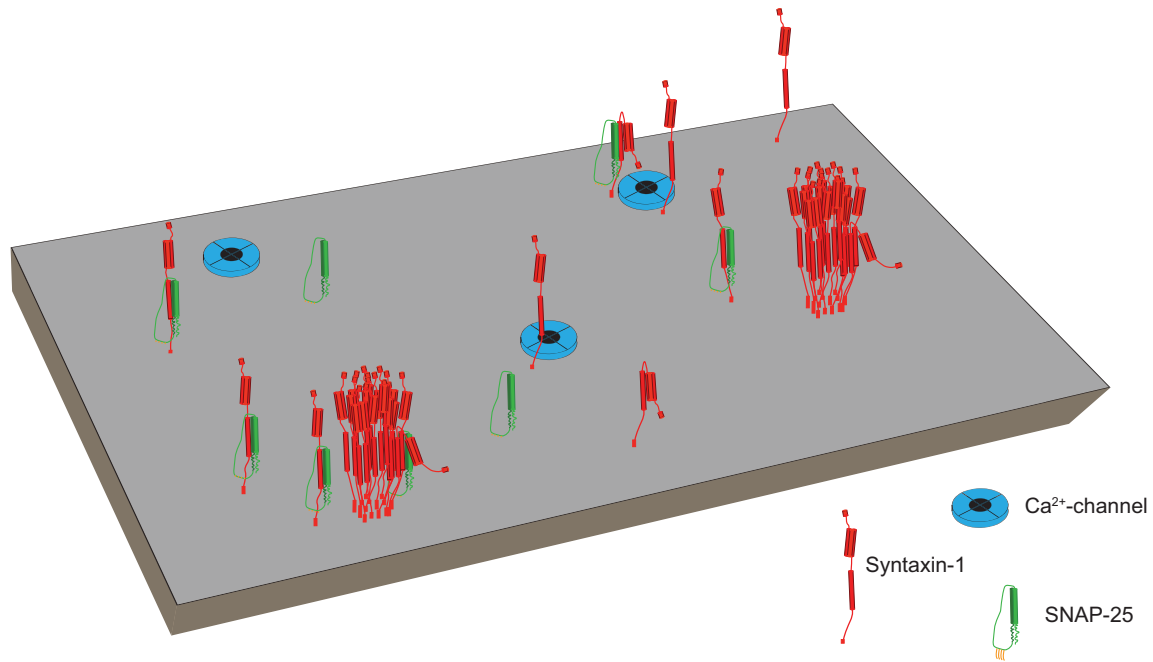

Toft-Bertelsen et al., Figure S4
